# Supplementary material for: Enhancement of heat dissipation in β-Ga2O3 Schottky diodes through Cu-filled thermal vias: experimental and simulation investigations
Source: Royal Society of Chemistry journal article supplement (doi:10.1039/d4tc01811g), 2024-01-01
Supplement: d4tc01811g1.pdf [file d4tc01811g1.pdf]

## Supplementary Information

### **Enhancement of Heat Dissipation in $\beta$ -Ga<sub>2</sub>O<sub>3</sub> Schottky Diodes through Cu-filled Thermal Vias: Experimental and Simulation Investigations**

Younghyun You<sup>1,2</sup>, Hui Won Eom<sup>3</sup>, Jehwan Park<sup>1</sup>, Myung Jun Kim<sup>3,\*</sup>, and Jihyun Kim<sup>1,\*</sup>

<sup>1</sup> Department of Chemical and Biological Engineering, Seoul National University, Seoul 08826, Republic of Korea

<sup>2</sup> Advanced Package Process Development Team, Samsung Electronics, Suwon 16677, Republic of Korea

<sup>3</sup> School of Chemical Engineering, Sungkyunkwan University, Suwon 16419, Republic of Korea

\*Corresponding authors: Myung Jun Kim ([mjkim09@g.skku.edu](mailto:mjkim09@g.skku.edu)) and Jihyun Kim ([jihyunkim@snu.ac.kr](mailto:jihyunkim@snu.ac.kr))

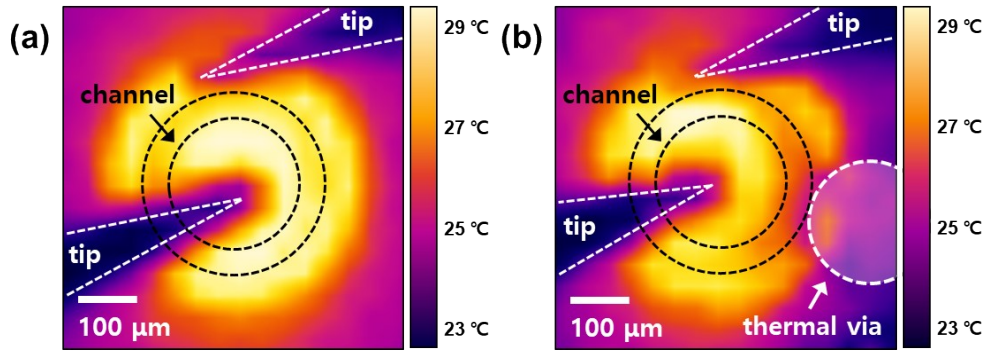

Figure S1. Infrared camera images of  $\beta$ -Ga<sub>2</sub>O<sub>3</sub> Schottky diodes (a) without and (b) with thermal via after application of a 1.2 W/mm<sup>3</sup> power.

Without thermal via, the temperature uniformly increased by approximately 4 °C from room temperature in all areas of the ring-shaped channel (yellow, ~29 °C). When a thermal via was used, there was a difference in temperature change in the channel area depending on the distance from the thermal via. In the channel region farthest from the thermal via (~280 μm), the same temperature was observed as that attained without the thermal via (yellow, ~29 °C). In the channel area located next to the thermal via, the temperature increase was relatively lower (red, ~26 °C). This difference may be because the heat was released at a faster rate to the outer parts of the device in regions close to the thermal via.

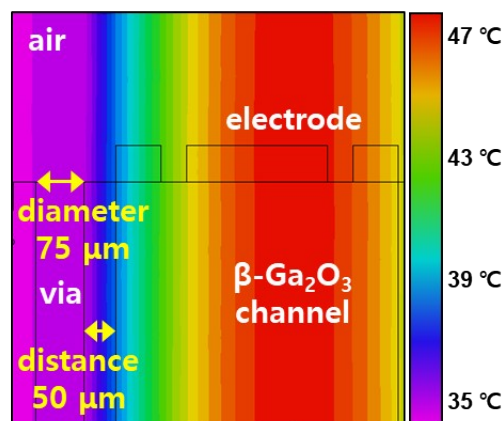

Figure S2. Simulated image of  $\beta$ -Ga<sub>2</sub>O<sub>3</sub> Schottky diode with taper-free thermal via after application of a power of 5.7 W/mm<sup>3</sup>.
